# Supplementary material for: Facile syntheses of alkoxysilanated phosphorylcholines as surface modifiers: CuAAC and thiol-ene “click” reactions
Source: Royal Society of Chemistry journal article supplement (doi:10.1039/c4ra15716h), 2015-01-01
Supplement: c4ra15716h1.pdf [file c4ra15716h1.pdf]

## Electronic Supplementary Information (ESI)

### Facile syntheses of alkoxy-silanated phosphorylcholines as surface modifiers: CuAAC and thiol-ene “click” reactions

Lei Liu, Sung Jin Park, Ji-hyun Park, Myong Euy Lee\*

*Department of Chemistry & Medical Chemistry, College of Science and Technology, Research & Education Center for Advanced Silicon Materials, Yonsei University, Wonju, Gangwondo, 220-710, Republic of Korea.*

*Corresponding Email: melgg@yonsei.ac.kr;*

*Fax: +82-33-760-2182; Tel: +82-33-760-2237*

### Table of Contents

| Sr. No | Description                           |
|--------|---------------------------------------|
| 1      | General information                   |
| 2      | Experimental information              |
| 3      | XPS spectra of (2c-silica, 2g-silica) |
| 4      | NMR Spectra                           |

### 1. General information

Fourier transform nuclear magnetic resonance (NMR) spectra were obtained using a Bruker AV-400 (<sup>1</sup>H at 400.13 MHz, <sup>13</sup>C at 100.61 MHz, <sup>29</sup>Si at 79.49 MHz, and <sup>31</sup>P at 161.97 MHz) NMR spectrometer. XPS was carried out at the Yonsei Center for Research Facilities, Yonsei University, Korea. Elemental analyses were performed with a Perkin-Elmer 2400 CHNS/O elemental analyzer. Gas chromatography analyses were performed on an Agilent Technologies GC/MS: 6890N incorporated with 5973N Mass Selective Detector, using Flame Ionization Detector (FID) and HP 5890 II plus (HP-515 m column).

All the solvents were dried by refluxing in sodium/benzophenone system. 3-chloropropylalkoxysilanes were purchased from Sigma-Aldrich and Gelest, and used with no further purification. 3-azidopropylsilanes (**1a-1d**) were synthesized using reported method.<sup>20</sup> 3-mercaptopropylsilanes (**1e-1g**) were purchased from Sigma-Aldrich. **1h** was synthesized from **1f** according to reported method.<sup>22</sup> PPC and APC were prepared according to our reported work.<sup>12,29</sup>

## 2. Experimental section

### 2.1 Typical procedure for synthesis of 3-azidopropylalkoxysilane (**1a-1d**)

Into a 50 mL Schlenk flask, 3-chloropropylalkoxysilane (10 mmol) and  $\text{NaN}_3$  (20 mmol) were placed under  $\text{N}_2$ . Then, DMF (20 mL) was added. After stirring at 75-100 °C for 12-16 h, the mixture was filtrated and handled in a low pressure to remove DMF. Then, the residue was distilled in a vacuum to obtain **1a-1b** as a colorless liquid in yields of 46-68%.

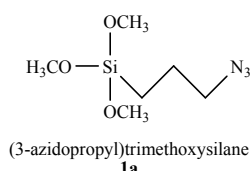

The reaction was carried out at 100 °C for 14 h, **1a** was synthesized obtained as a colorless liquid in a yield of 68%. bp. 91°C, 10 mmHg.  $\delta_{\text{H}}$  (400 MHz;  $\text{CDCl}_3$ ) 3.48 (9H, s,  $\text{CH}_3$ ), 3.15-3.19 (2H, t,  $\text{CH}_2\text{N}_3$ ), 1.57-1.63 (2H, q,  $\text{CH}_2\text{CH}_2\text{N}_3$ ), 0.58-0.62 (2H, t,  $\text{SiCH}_2$ ).  $\delta_{\text{C}}$  (100 MHz;  $\text{CDCl}_3$ ) 53.8, 50.6, 22.56, 6.40. GC/MS:  $m/z$  162.1 ( $\text{M}^+ - \text{N}_3$ , 2.3%), 145.1 (12.8), 121.0 (100), 91.0 (56.4), 59.0 (17.1) etc.

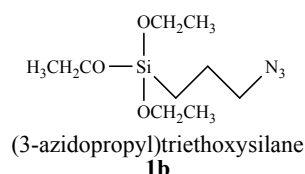

The reaction was carried out at 100 °C for 16 h, **1b** was obtained as a colorless liquid in a yield of 62%. bp. 58-60 °C, 0.2 torr.  $\delta_{\text{H}}$  (400 MHz;  $\text{CDCl}_3$ ) 3.79-3.85 (6H, q,  $\text{OCH}_2$ ), 3.24-3.28 (2H, t,  $\text{CH}_2\text{N}_3$ ), 1.67-1.75 (2H, m,  $\text{CH}_2\text{CH}_2\text{N}_3$ ), 1.23-1.26 (9H, t,  $\text{CH}_3$ ), 0.62-0.63 (2H, t,  $\text{SiCH}_2$ ).  $\delta_{\text{C}}$  (100 MHz;  $\text{CDCl}_3$ ) 58.6, 54.0, 32.8, 18.4, 7.84. GC/MS:  $m/z$  202.1 ( $\text{M}^+-\text{N}_3$ , 2.0%), 163.1 (100), 119.1 (60.1), 79.0 (39.6), 63.0 (24.2) etc.

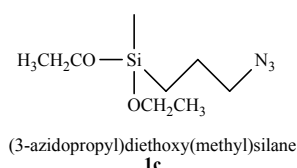

The reaction was carried out at 85 °C for 12 h, **1c** was obtained as a colorless liquid in a yield of 56%. bp. 40 °C, 0.18 torr.  $\delta_{\text{H}}$  (400 MHz;  $\text{CDCl}_3$ ) 3.69-3.74 (4H, q,  $\text{OCH}_2$ ), 3.18-3.22 (2H, t,  $\text{CH}_2\text{N}_3$ ), 1.58-1.66 (2H, m,  $\text{SiCH}_2\text{CH}_2$ ), 1.15-1.18 (6H, t,  $\text{CH}_3$ ), 0.58-0.62 (2H, t,  $\text{SiCH}_2$ ), 0.08 (3H, s,  $\text{SiCH}_3$ ).  $\delta_{\text{C}}$  (100 MHz;  $\text{CDCl}_3$ ) 57.9, 53.8, 22.5, 18.1, 10.9, 5.17. GC/MS:  $m/z$  174.2 ( $\text{M}^+-\text{N}_3$ , 2.3%), 146.1 (8.0), 133.2 (100), 105.1 (20.0), 77.1 (34.3) etc.

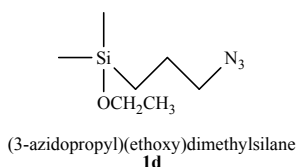

The reaction was carried out at 80 °C for 12 h, **1d** was obtained as a colorless liquid in a yield of 46%. bp. 94-96 °C, 30 mmHg.  $\delta_{\text{H}}$  (400 MHz;  $\text{CDCl}_3$ ) 3.59-3.64 (2H, q,  $\text{CH}_2\text{N}_3$ ), 3.18-3.21 (2H, t,  $\text{CH}_2\text{O}$ ), 1.58-1.62 (2H, q,  $\text{SiCH}_2\text{CH}_2$ ), 1.12-1.15 (3H, t,  $\text{CH}_3$ ), 0.56-0.61 (2H, t,  $\text{SiCH}_2$ ), 0.07 (3H, s,  $\text{CH}_3$ ).  $\delta_{\text{C}}$  (100 MHz;  $\text{CDCl}_3$ ) 58.3, 54.3, 23.1, 18.6, 13.6, 0.03. GC/MS:  $m/z$  144.2 ( $\text{M}^+-\text{N}_3$ , 2.1%), 116.1 (16.4), 103.2 (100), 75.1 (45.8), 59.1 (21.3) etc.

## 2.2 Synthesis of 1h

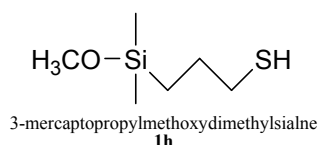

**1h** was synthesized from **1f** according to reported work.<sup>30</sup>  $\delta_{\text{H}}$  (400 MHz;  $\text{CDCl}_3$ ) 3.25 (3H, s,  $\text{OCH}_3$ ), 2.26 (2H, q,  $\text{SCH}_2$ ), 1.51 (2H, m,  $\text{SiCH}_2\text{CH}_2$ ), 1.24 (1H, t, SH), 0.48 (2H, m,  $\text{SiCH}_2$ ), 0.04(6H, s,  $\text{SiCH}_3$ ). GC/MS:  $m/z$  164.2 (M, 1.2%) 149.1 (27.1), 132.1 (61.7), 89.2 (100), 59.2 (40) etc.

### 2.3 Typical procedure for the synthesis of triazole-bridged alkoxy silanes (2a-2d)

Equimolar amounts of 3-azidopropylalkoxysilane and PPC (1 mmol) were mixed in the presence of CuI/DIPEA (2 mmol/4 mmol). Then, these reactants were dissolved in ethanol under Ar. Reactions could be run in ethanol and proceed smoothly at 60°C for 12 h. To purify the final products, the Cu(I) catalyst was filtrated under  $\text{N}_2$ . After removing the solvent at reduced pressure, the residue was washed several times using anhydrous hexane and dried in a vacuum. Finally, the targeted products were obtained as yellow powders in yields of 90-92%.

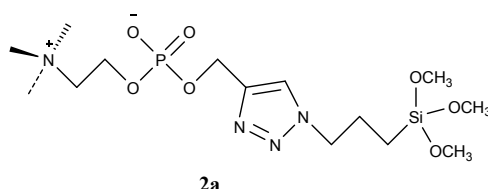

**2a** was obtained as a yellow powder in a yield of 90%.  $\delta_{\text{H}}$  (400 MHz;  $\text{CD}_3\text{OD}$ ) 7.92 (1H, s,  $\text{CHN}_3$ ), 5.02-5.04 (2H, d,  $\text{OCH}_2\text{C}=\text{N}$ ), 4.42-4.44 (2H, t,  $\text{CH}_2\text{CH}_2\text{N}$ ), 4.32 (2H, s,  $\text{N}_3\text{CH}_2$ ), 3.50-3.61 (11H, m,  $\text{OCH}_3$ ,  $\text{CH}_2\text{CH}_2\text{N}$ ), 3.29 (9H, s,  $\text{NCH}_3$ ), 1.90-1.96 (2H, m,  $\text{SiCH}_2\text{CH}_2$ ), 0.58-0.65 (2H, t,  $\text{SiCH}_2$ ).  $\delta_{\text{C}}$  (100 MHz;  $\text{CD}_3\text{OD}$ ) 141.7, 127.2, 71.2, 66.1, 58.7, 55.0, 54.5, 49.6, 19.4, 8.17.  $\delta_{\text{P}}$  (161 MHz;  $\text{CD}_3\text{OD}$ ) -0.56.

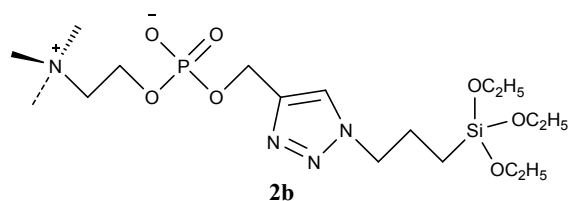

**2b** was obtained as a yellow powder in a yield of 91%.  $\delta_{\text{H}}$  (400 MHz; CD<sub>3</sub>OD) 8.00 (1H, s, CHN<sub>3</sub>), 5.06-5.08 (2H, d, OCH<sub>2</sub>C=), 4.44-4.47 (2H, t, CH<sub>2</sub>CH<sub>2</sub>N), 4.33 (2H, s, N<sub>3</sub>CH<sub>2</sub>), 3.87-3.93 (6H, q, SiOCH<sub>2</sub>), 3.68-3.70 (2H, t, CH<sub>2</sub>CH<sub>2</sub>N), 3.30 (9H, s, NCH<sub>3</sub>), 2.02-2.13 (2H, m, SiCH<sub>2</sub>CH<sub>2</sub>), 1.28-1.31 (9H, t, SiOCH<sub>2</sub>CH<sub>3</sub>), 0.63-0.70 (2H, t, SiCH<sub>2</sub>).  $\delta_{\text{C}}$  (100 MHz; CD<sub>3</sub>OD) 146.2, 125.3, 67.5, 60.4, 59.8, 58.3, 54.7, 53.6, 25.3, 18.7, 8.29.  $\delta_{\text{Si}}$  (79 MHz; CD<sub>3</sub>OD) -46.54.  $\delta_{\text{P}}$  (161 MHz; CD<sub>3</sub>OD) -0.62.

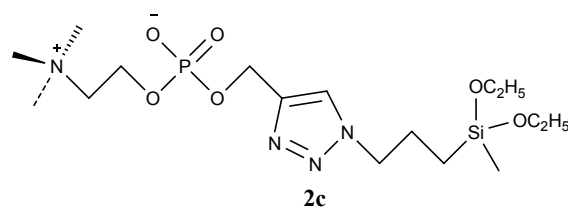

**2c** was obtained as a yellow powder in a yield of 91%.  $\delta_{\text{H}}$  (400 MHz; CD<sub>3</sub>OD) 7.96 (1H, s, CHN<sub>3</sub>), 4.91-4.93 (2H, d, OCH<sub>2</sub>C=), 4.32-4.34 (2H, t, CH<sub>2</sub>CH<sub>2</sub>N), 4.21 (2H, s, N<sub>3</sub>CH<sub>2</sub>), 3.66-3.69 (4H, q, SiOCH<sub>2</sub>), 3.51-3.58 (2H, t, CH<sub>2</sub>CH<sub>2</sub>N), 3.16 (9H, s, NCH<sub>3</sub>), 1.87-1.89 (2H, m, SiCH<sub>2</sub>CH<sub>2</sub>), 1.05-1.07 (6H, t, SiOCH<sub>2</sub>CH<sub>3</sub>), 0.48-0.52 (2H, t, SiCH<sub>2</sub>), 0.06 (3H, s, SiCH<sub>3</sub>).  $\delta_{\text{C}}$  (100 MHz; CD<sub>3</sub>OD) 145.5, 124.8, 67.0, 59.3, 57.8, 54.2, 52.9, 51.0, 23.2, 17.9, 10.2, 0.62.  $\delta_{\text{P}}$  (161 MHz; CD<sub>3</sub>OD) -0.39.

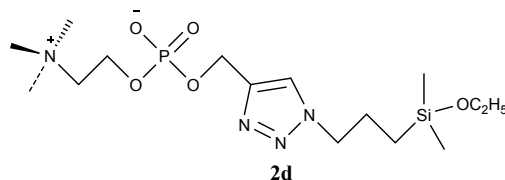

**2d** was obtained as a yellow powder in a yield of 92%.  $\delta_{\text{H}}$  (400 MHz; CD<sub>3</sub>OD) 7.92 (1H, s, CHN<sub>3</sub>), 4.86-4.88 (2H, d, OCH<sub>2</sub>C=), 4.25-4.27 (2H, t, CH<sub>2</sub>CH<sub>2</sub>N), 4.15 (2H, s, N<sub>3</sub>CH<sub>2</sub>), 3.53 (4H, br s, SiOCH<sub>2</sub>, CH<sub>2</sub>CH<sub>2</sub>N), 3.11 (9H, s, NCH<sub>3</sub>), 1.80 (2H, m, SiCH<sub>2</sub>CH<sub>2</sub>), 1.04-1.06 (3H, t, SiOCH<sub>2</sub>CH<sub>3</sub>), 0.37-0.43 (2H, t, SiCH<sub>2</sub>), 0.02 (6H, s, SiCH<sub>3</sub>).  $\delta_{\text{C}}$  (100 MHz; CD<sub>3</sub>OD) 146.0, 125.5, 67.6, 65.3, 60.5, 59.5, 57.8, 54.6, 25.9,

19.6, 14.0, 0.44.  $\delta_P$  (161 MHz; CD<sub>3</sub>OD) -0.24.

## 2.4 Typical procedure for the synthesis of 2e-2h

A slight excess of 3-mercaptopropyl alkoxy silane (**1e-1h**, 1.10 mmol) and APC (1 mmol) were dissolved in 2 mL of EtOH in the presence of 2 mol% benzophenone. The reactions proceeded for 15 min at room temperature under a 300 nm UV lamp. After removing the solvents at reduced pressure, the crude product residue was washed with hexane to remove excess 3-mercaptopropyl alkoxy silanes and benzophenone. The final products precipitated from hexane as light yellow powders, and then the precipitation was dried in a vacuum. (**2e-2h**) were obtained in quantitative yields.

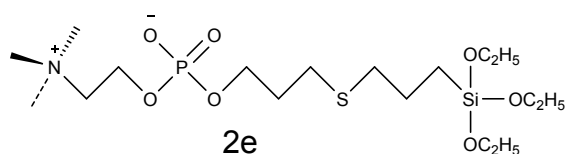

**2e** was obtained as a yellow powder.  $\delta_H$  (400 MHz; CD<sub>3</sub>OD) 4.19 (2H, br s, NCH<sub>2</sub>CH<sub>2</sub>), 3.88-3.91 (2H, t, POCH<sub>2</sub>), 3.74-3.77 (6H, q, SiOCH<sub>2</sub>), 3.56-3.58 (2H, t, NCH<sub>2</sub>), 3.16 (9H, s, NCH<sub>3</sub>), 2.45-2.56 (4H, tt, CH<sub>2</sub>SCH<sub>2</sub>), 1.79-1.85 (2H, m, POCH<sub>2</sub>CH<sub>2</sub>), 1.57-1.63 (2H, m, SiCH<sub>2</sub>CH<sub>2</sub>), 1.14 (9H, s, CH<sub>3</sub>), 0.68-0.71 (2H, t, SiCH<sub>2</sub>).  $\delta_C$  (100 MHz; CD<sub>3</sub>OD) 67.8, 65.7, 59.8, 58.6, 55.0, 36.1, 32.1, 29.3, 24.6, 19.0, 18.7.  $\delta_P$  (161 MHz; CD<sub>3</sub>OD) -0.21.

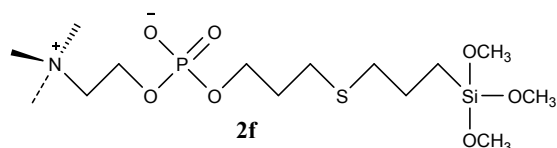

**2f** was obtained as a yellow powder.  $\delta_H$  (400 MHz; CD<sub>3</sub>OD) 4.13 (2H, br s, NCH<sub>2</sub>CH<sub>2</sub>), 3.82-3.88 (2 H, m, POCH<sub>2</sub>), 3.49-3.65 (2H, t, NCH<sub>2</sub>; 9H, s, OCH<sub>3</sub>), 3.11 (9H, s, NCH<sub>3</sub>), 2.40-2.52 (4H, tt, CH<sub>2</sub>SCH<sub>2</sub>), 1.74-1.77 (2H, t, POCH<sub>2</sub>CH<sub>2</sub>), 1.59 (2H, s, SiCH<sub>2</sub>CH<sub>2</sub>), 0.57-0.61 (2H, t, SiCH<sub>2</sub>).  $\delta_C$  (100 MHz; CD<sub>3</sub>OD) 67.7, 65.5, 60.6, 54.9,

51.2, 36.2, 31.9, 29.1, 24.7, 17.8.  $\delta_p$  (161 MHz; CD<sub>3</sub>OD) -0.16.

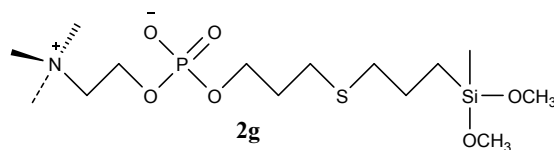

**2g** was obtained as a yellow powder.  $\delta_H$  (400 MHz; CD<sub>3</sub>OD) 4.20 (2H, br s, NCH<sub>2</sub>CH<sub>2</sub>), 3.89-3.91 (2 H, m, POCH<sub>2</sub>), 3.58-3.72 (2H, t, NCH<sub>2</sub>; 6H, s, OCH<sub>3</sub>), 3.16 (9H, s, NCH<sub>3</sub>), 2.48-2.56 (4H, tt, CH<sub>2</sub>SCH<sub>2</sub>), 1.83-1.85 (2H, t, POCH<sub>2</sub>CH<sub>2</sub>), 1.58-1.60 (2H, s, SiCH<sub>2</sub>CH<sub>2</sub>), 0.86-0.89 (2H, t, SiCH<sub>2</sub>), 0.02 (3H, s, SiCH<sub>3</sub>).  $\delta_C$  (100 MHz; CD<sub>3</sub>OD) 67.6, 65.4, 60.4, 54.8, 48.1, 36.2, 32.0, 29.1, 24.7, 17.5, 0.15.  $\delta_p$  (161 MHz; CD<sub>3</sub>OD) -0.10.

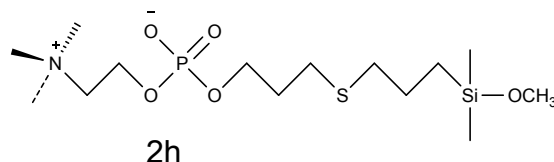

**2h** was obtained as a yellow powder.  $\delta_H$  (400 MHz; CD<sub>3</sub>OD) 4.33-4.34 (2H, br s, NCH<sub>2</sub>CH<sub>2</sub>), 3.88-3.93 (2H, m, POCH<sub>2</sub>), 3.70 (2H, t, NCH<sub>2</sub>), 3.58 (3H, s, OCH<sub>3</sub>), 3.17 (9H, s, NCH<sub>3</sub>), 2.43-2.59 (4H, tt, CH<sub>2</sub>SCH<sub>2</sub>), 1.82-1.85 (2H, t, POCH<sub>2</sub>CH<sub>2</sub>), 1.60-1.62 (2H, s, SiCH<sub>2</sub>CH<sub>2</sub>), 0.59-0.63 (2H, t, SiCH<sub>2</sub>), 0.02-0.04 (6H, s, SiCH<sub>3</sub>).  $\delta_C$  (100 MHz; CD<sub>3</sub>OD) 67.4, 65.2, 60.1, 54.2, 47.9, 36.0, 31.5, 28.6, 24.0, 17.0, 0.09.  $\delta_p$  (161 MHz; CD<sub>3</sub>OD) -0.06

## 2.5 Typical procedure for the surface modification of silica beads

### 2.5.1 Typical procedure for the surface modification of silica beads using triazole-bridged alkoxy-silanated PC (2a-2d)

A mixture consisting of triazole-bridged silanated PC (1 mmol) of (**2a-2d**), 400 mg of amorphous silica balls (Aldrich, USA, 10  $\mu$ m, 300 m<sup>2</sup>g<sup>-1</sup>) and 20 mL of IPA/toluene (V/V = 1:1) was placed in a 50 mL high pressure vessel and heated at 90 °C for 24 h. After cooling to room temperature, the resulted silica was filtered and washed with

methanol and toluene, and dried under vacuum to yield a light yellow powder (**2a-silica**).

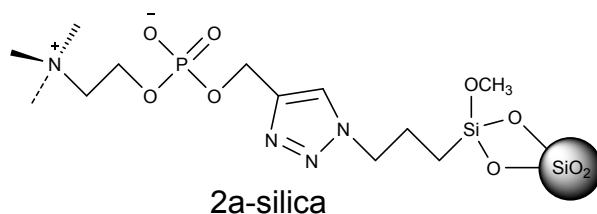

**2a-silica** was obtained as light yellow powder. Found: C, 6.0886; N, 2.4524%. The loading rate for alkoxy-silanated PC was based on the N value of modified silica determined by elemental analysis. For example: calculation of the loading rate of **2a** modified silica **2a-silica** =  $(2.4524 \times 10^{-2} \text{ g of N/1 g of compound PC-modified silica } \mathbf{2a-silica}) \times (10^3 \text{ mmol of N/14 g of N}) \times (1 \text{ mmol of } \mathbf{2a}/4 \text{ mmol of N}) = 0.44 \text{ mmol } \mathbf{2a}/1 \text{ g of compound PC-modified } \mathbf{2a-silica}$ .

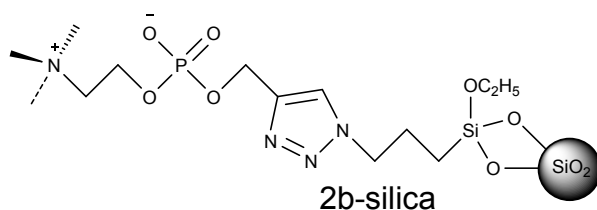

**2b-silica** was obtained as light yellow powder. Found: C, 5.6236; N, 2.1188%. The loading rate for alkoxy-silanated PC was based on the N value of modified silica determined by elemental analysis. For example: calculation of the loading rate of **2b** modified silica **2b-silica** =  $(2.1188 \times 10^{-2} \text{ g of N/1 g of compound PC-modified silica } \mathbf{2b-silica}) \times (10^3 \text{ mmol of N/14 g of N}) \times (1 \text{ mmol of } \mathbf{2b}/4 \text{ mmol of N}) = 0.38 \text{ mmol } \mathbf{2b}/1 \text{ g of compound PC-modified } \mathbf{2b-silica}$ .

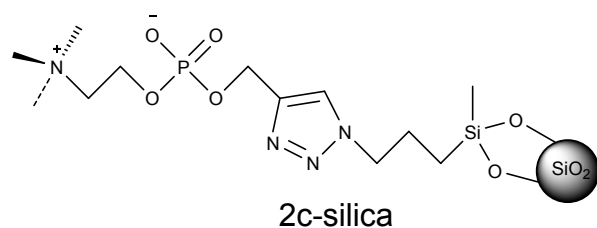

**2c-silica** was obtained as light yellow powder. Found: C, 5.2442; N, 1.7159%. The



loading rate for alkoxy-silanated PC was based on the N value of modified silica determined by elemental analysis. For example: calculation of the loading rate of **2c** modified silica **2c-silica** =  $(1.7159 \times 10^{-2} \text{ g of N/1 g of compound PC-modified silica } \mathbf{2c-silica}) \times (10^3 \text{ mmol of N/14 g of N}) \times (1 \text{ mmol of } \mathbf{2c}/4 \text{ mmol of N}) = 0.31 \text{ mmol } \mathbf{2c}/1 \text{ g of compound PC-modified } \mathbf{2c-silica}$ .

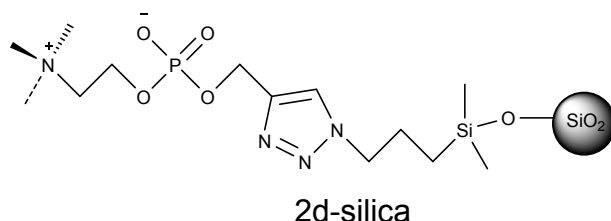

**2d-silica** was obtained as light yellow powder. Found: C, 5.1701; N, 1.8836%. The loading rate for alkoxy-silanated PC was based on the N value of modified silica determined by elemental analysis. For example: calculation of the loading rate of **2d** modified silica **2d-silica** =  $(1.8836 \times 10^{-2} \text{ g of N/1 g of compound PC-modified silica } \mathbf{2d-silica}) \times (10^3 \text{ mmol of N/14 g of N}) \times (1 \text{ mmol of } \mathbf{2d}/4 \text{ mmol of N}) = 0.34 \text{ mmol } \mathbf{2d}/1 \text{ g of compound PC-modified } \mathbf{2d-silica}$ .

### 2.5.1 Typical procedure for the surface modification of silica beads using sulfur-bridged alkoxy-silanated PC (**2e-2h**)

A mixture consisting of sulfur-bridged silanated PC (1 mmol) of (**2e-2h**), 400 mg of amorphous silica balls (Aldrich, USA, 10  $\mu\text{m}$ , 300  $\text{m}^2\text{g}^{-1}$ ) and 20 mL of IPA/toluene (V/V = 1:1) was placed in a 50 mL high pressure vessel and heated at 90  $^\circ\text{C}$  for 24 h. After cooling to room temperature, the resulted silica was filtered and washed with methanol and toluene, and dried under vacuum to yield a light yellow powder (**2e-2h**)-silica.

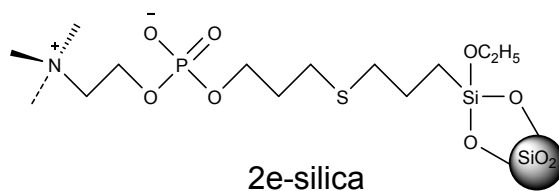

**2e-silica** was obtained as light yellow powder. Found: C, 7.8973; N, 0.7748%. The loading rate for alkoxy-silanated PC was based on the N value of modified silica

determined by elemental analysis. For example: calculation of the loading rate of **2e** modified silica **2e-silica** =  $(0.7748 \times 10^{-2} \text{ g of N/1 g of compound PC-modified silica } \mathbf{2e-silica}) \times (10^3 \text{ mmol of N/14 g of N}) \times (1 \text{ mmol of } \mathbf{2e}/1 \text{ mmol of N}) = 0.55 \text{ mmol } \mathbf{2e}/1 \text{ g of compound PC-modified } \mathbf{2e-silica}$ .

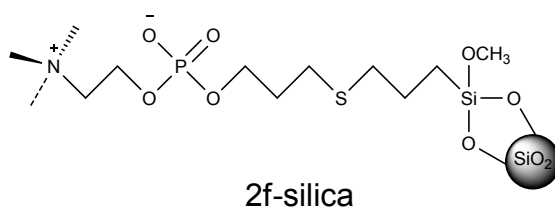

**2f-silica** was obtained as light yellow powder. Found: C, 9.0929; N, 0.8921%. The loading rate for alkoxy-silanated PC was based on the N value of modified silica determined by elemental analysis. For example: calculation of the loading rate of **2f** modified silica **2f-silica** =  $(0.8921 \times 10^{-2} \text{ g of N/1 g of compound PC-modified silica } \mathbf{2f-silica}) \times (10^3 \text{ mmol of N/14 g of N}) \times (1 \text{ mmol of } \mathbf{2f}/1 \text{ mmol of N}) = 0.63 \text{ mmol } \mathbf{2f}/1 \text{ g of compound PC-modified } \mathbf{2f-silica}$ .

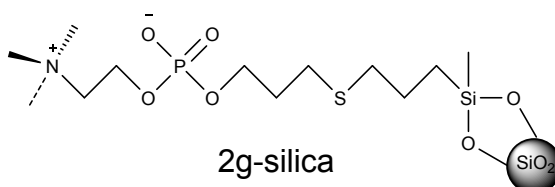

**2g-silica** was obtained as light yellow powder. Found: C, 6.0606; N, 0.5946%. The loading rate for alkoxy-silanated PC was based on the N value of modified silica determined by elemental analysis. For example: calculation of the loading rate of **2g** modified silica **2g-silica** =  $(0.5946 \times 10^{-2} \text{ g of N/1 g of compound PC-modified silica } \mathbf{2g-silica}) \times (10^3 \text{ mmol of N/14 g of N}) \times (1 \text{ mmol of } \mathbf{2g}/1 \text{ mmol of N}) = 0.42 \text{ mmol } \mathbf{2g}/1 \text{ g of compound PC-modified } \mathbf{2g-silica}$ .

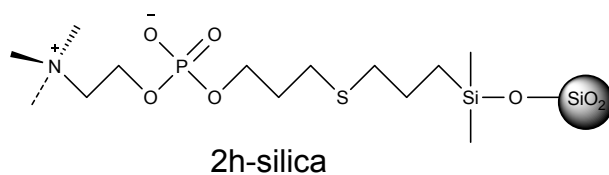

**2h-silica** was obtained as light yellow powder. Found: C, 6.2050; N, 0.6089%. The loading rate for alkoxy-silanated PC was based on the N value of modified silica determined by elemental analysis. For example: calculation of the loading rate of **2h** modified silica **2h-silica** =  $(0.6089 \times 10^{-2} \text{ g of N} / 1 \text{ g of compound PC-modified silica } \mathbf{2h-silica}) \times (10^3 \text{ mmol of N} / 14 \text{ g of N}) \times (1 \text{ mmol of } \mathbf{2h} / 1 \text{ mmol of N}) = 0.43 \text{ mmol } \mathbf{2h} / 1 \text{ g of compound PC-modified } \mathbf{2h-silica}$ .

### 3. XPS spectra of 2c-silica and 2g-silica

#### 3.1 XPS spectra of 2c-silica

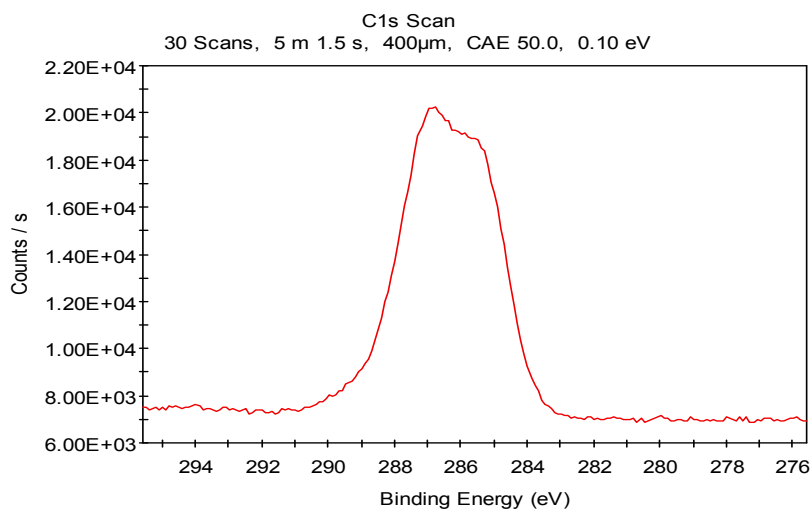

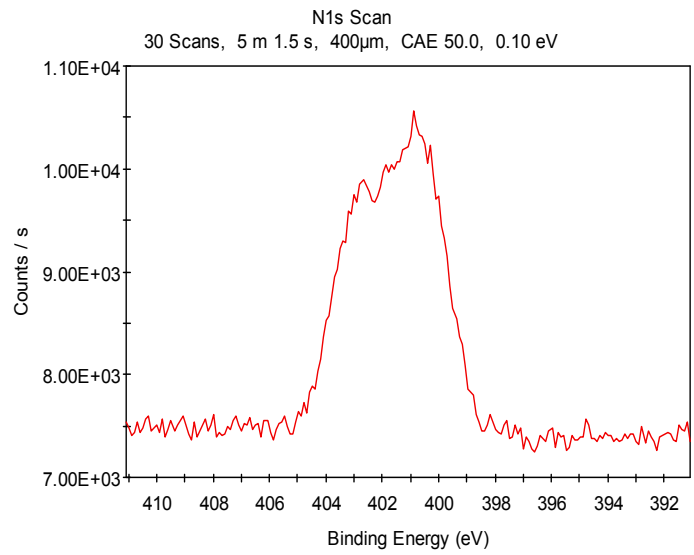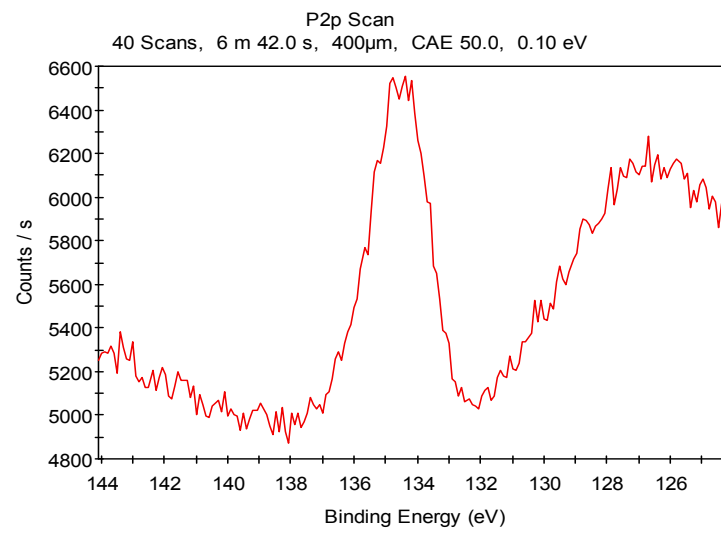

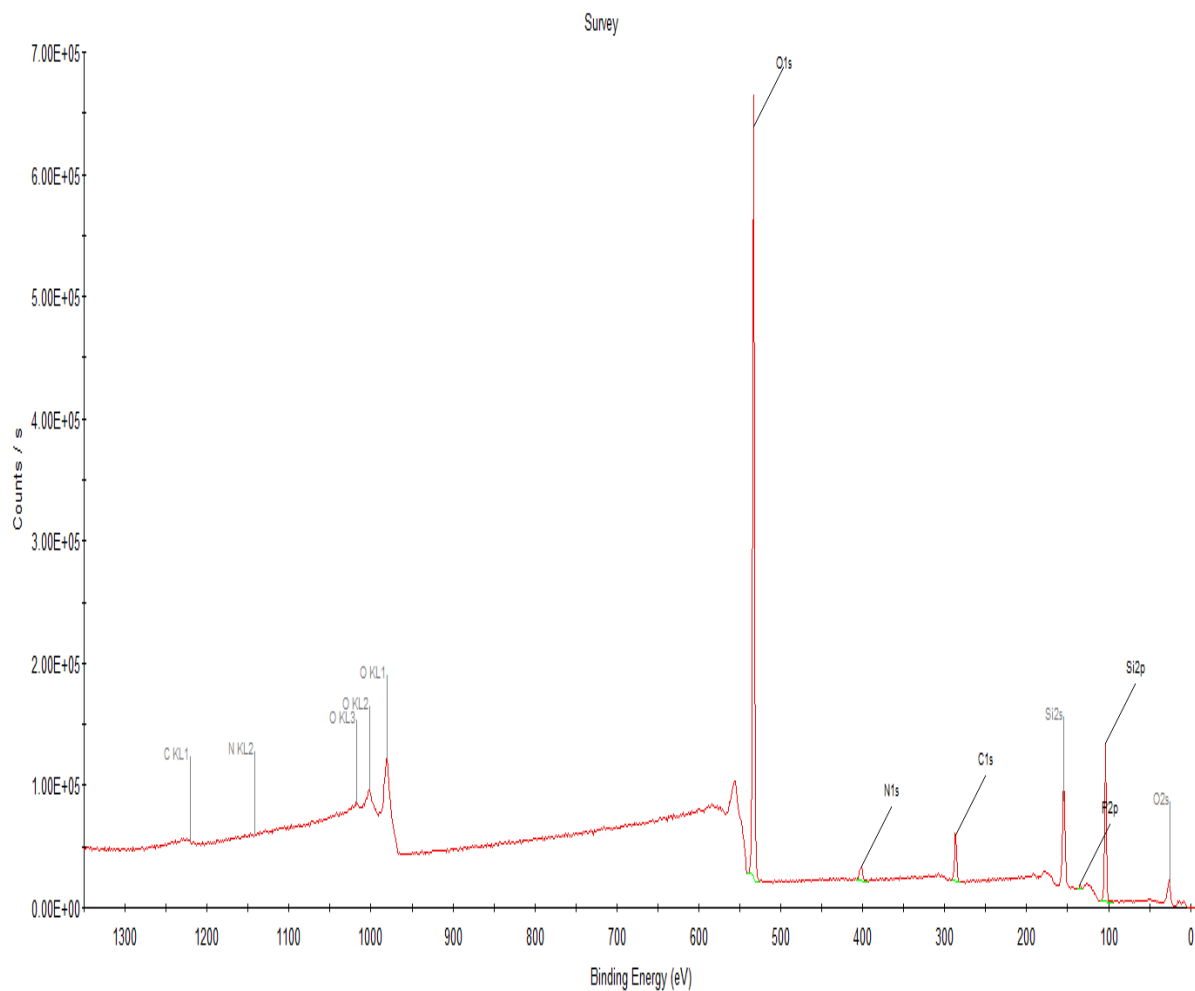

### 3.2 XPS spectra of 2g-silica

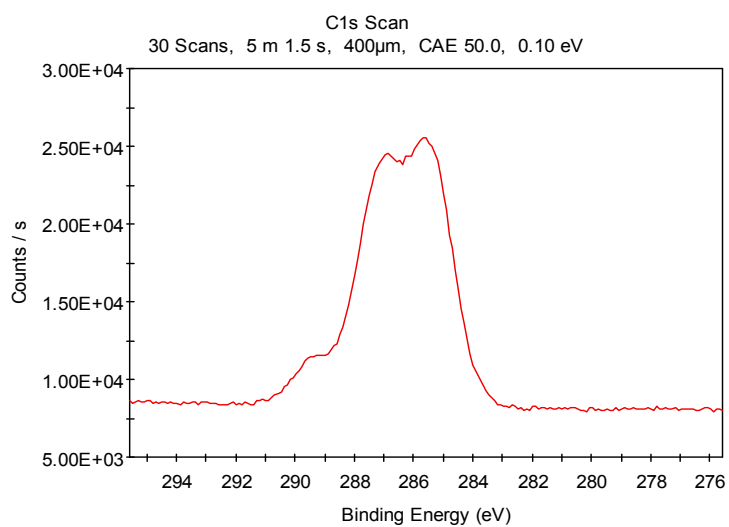

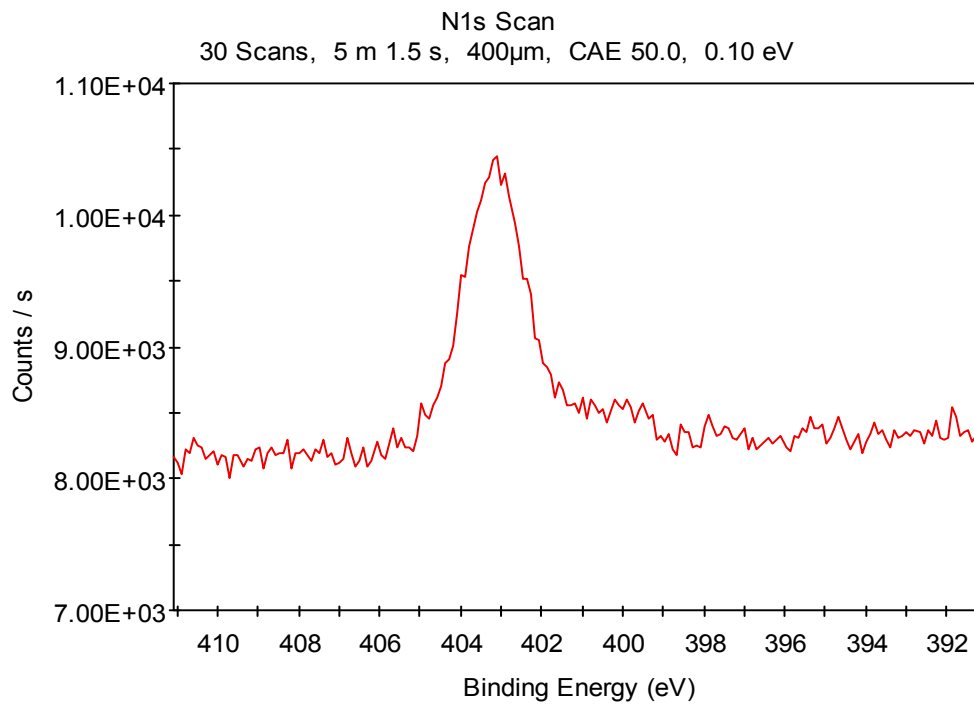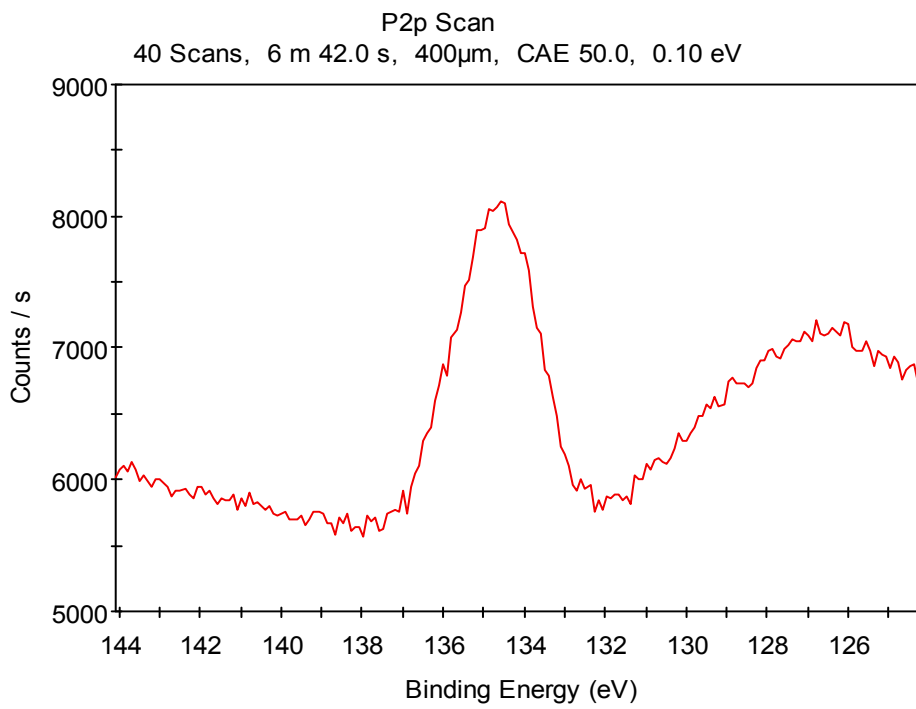

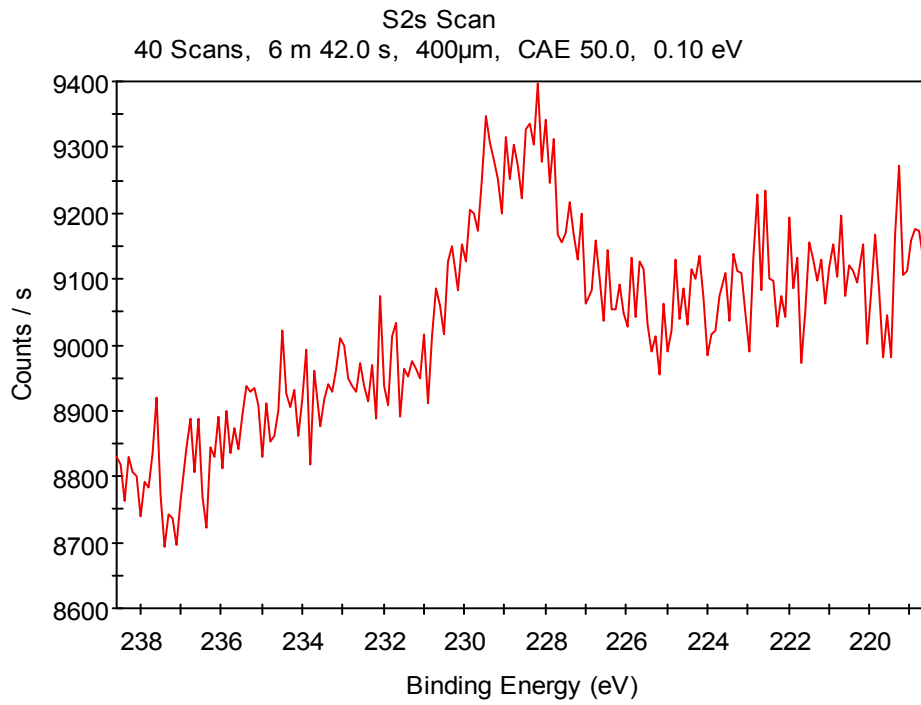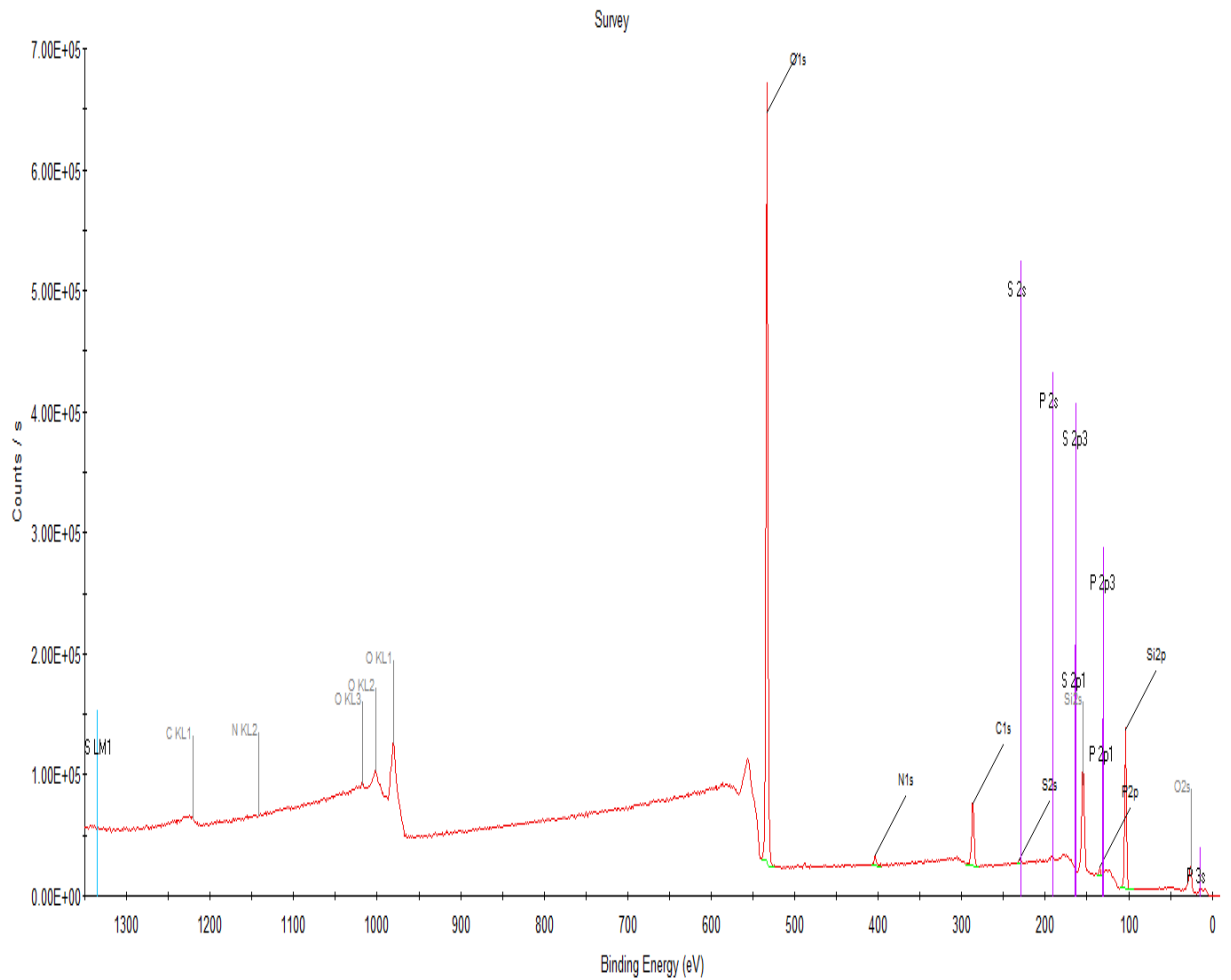

## 4.0 NMR spectra of representative products

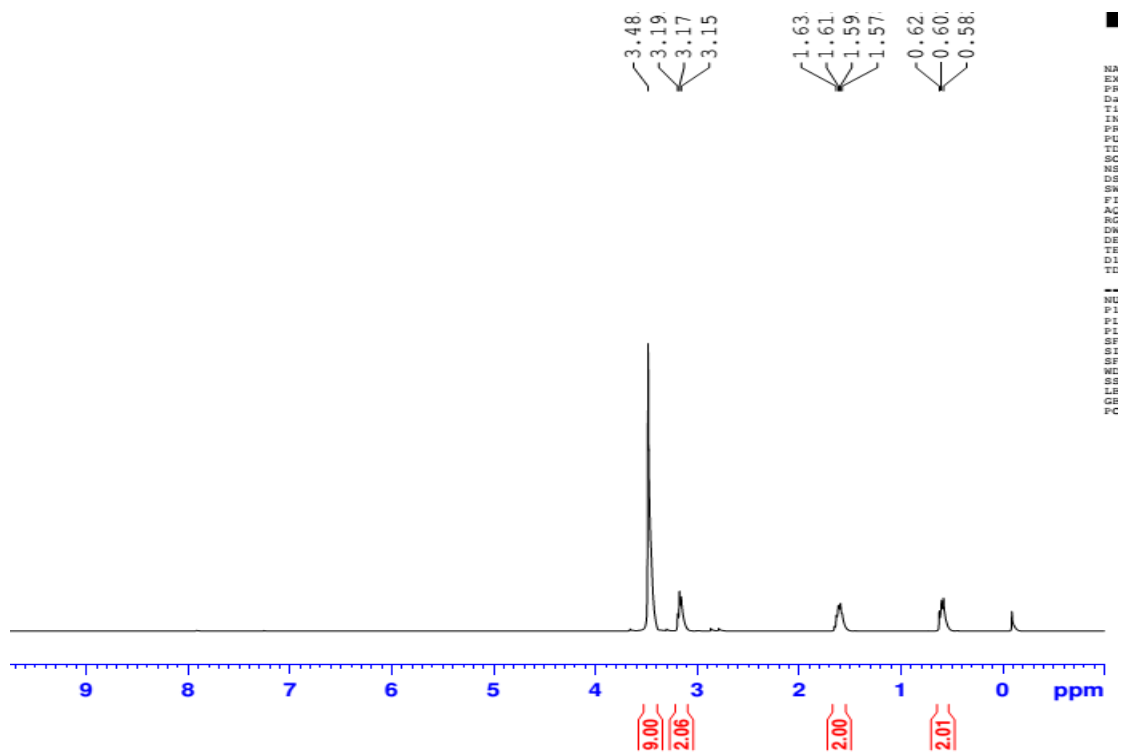

Fig.1 H-NMR of 1a

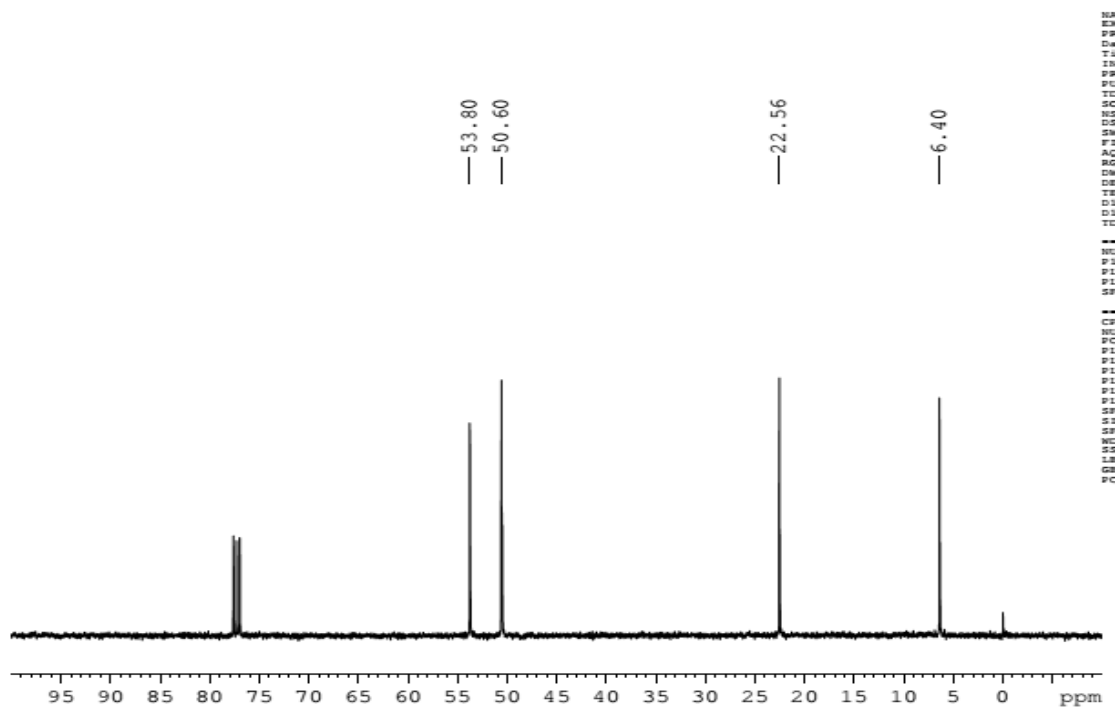

Fig.2 C-NMR of 1a



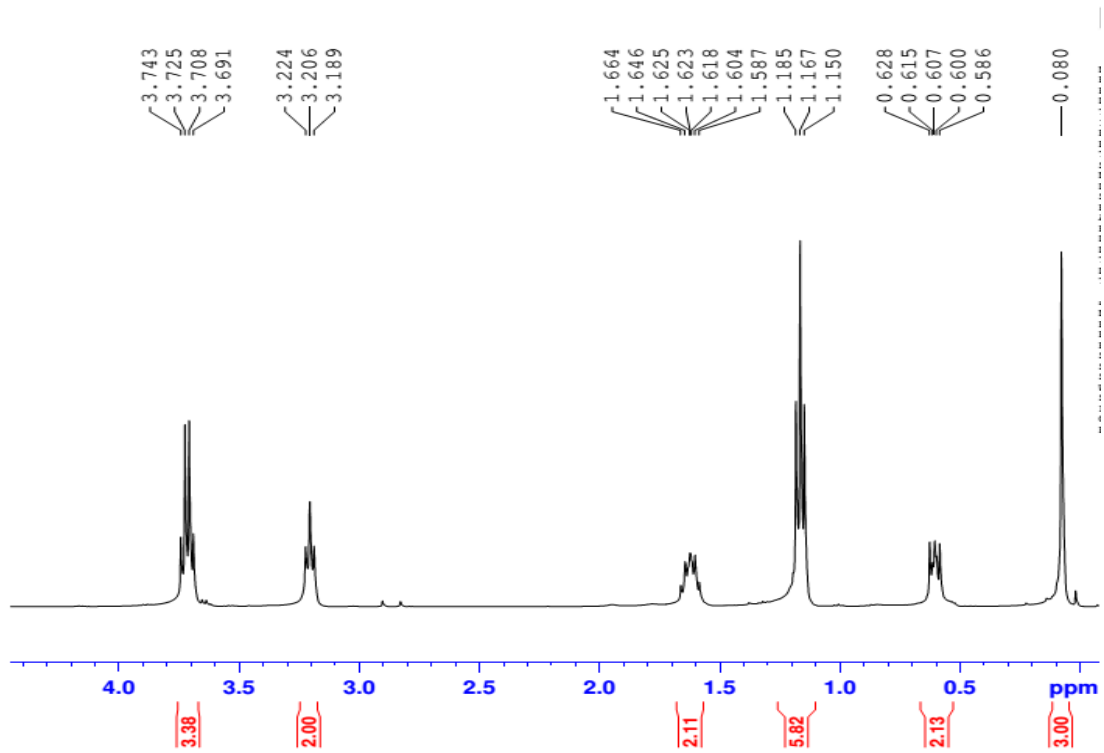

**Fig.3 H-NMR of 1b**

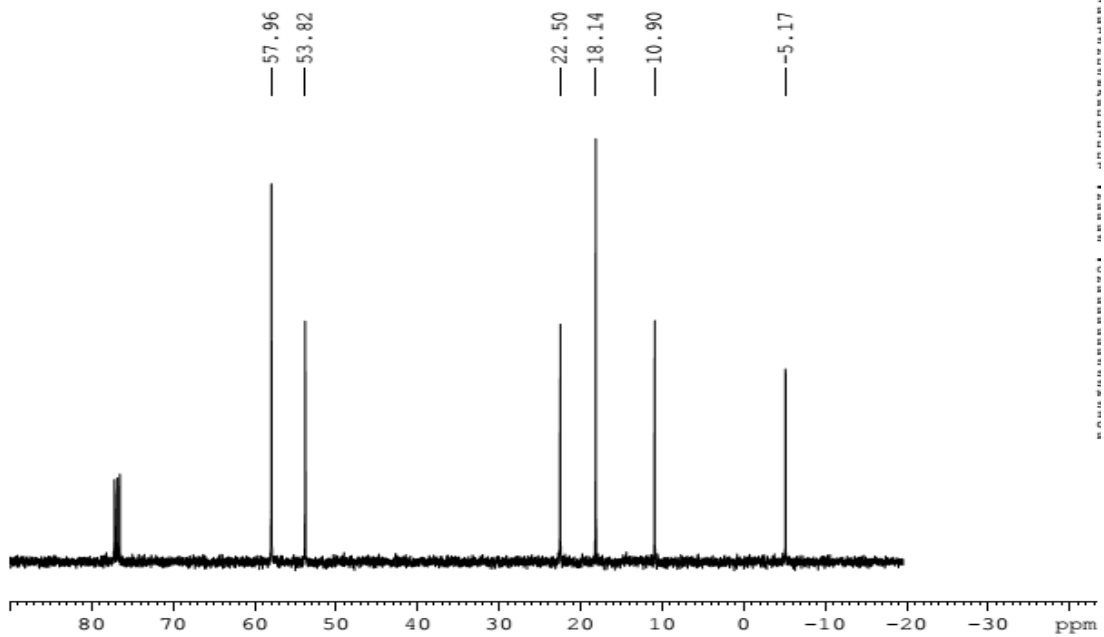

**Fig.4 C-NMR of 1b**

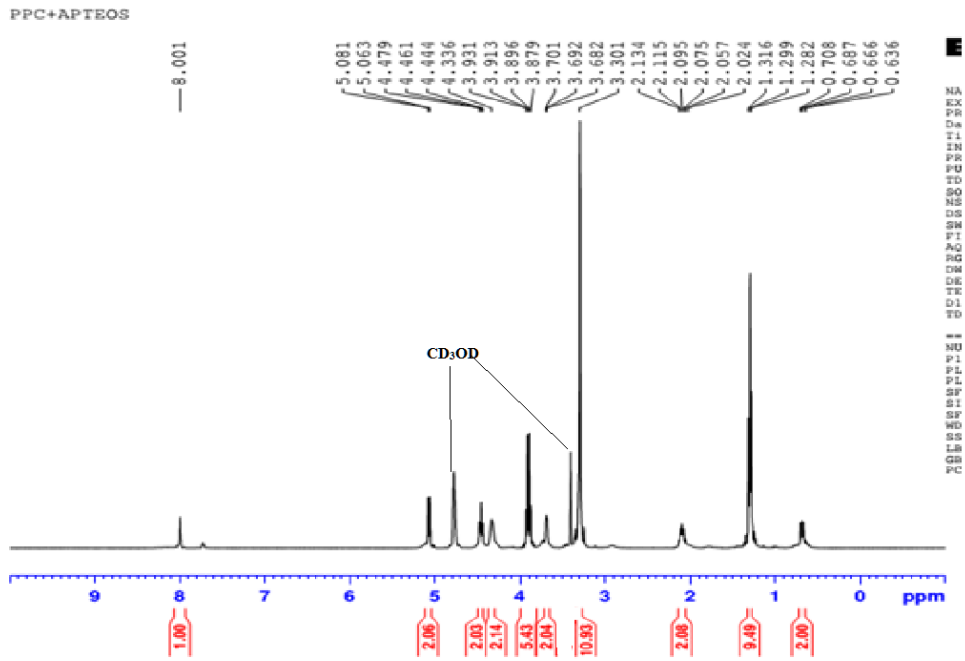

**Fig.5 H-NMR of 2b**

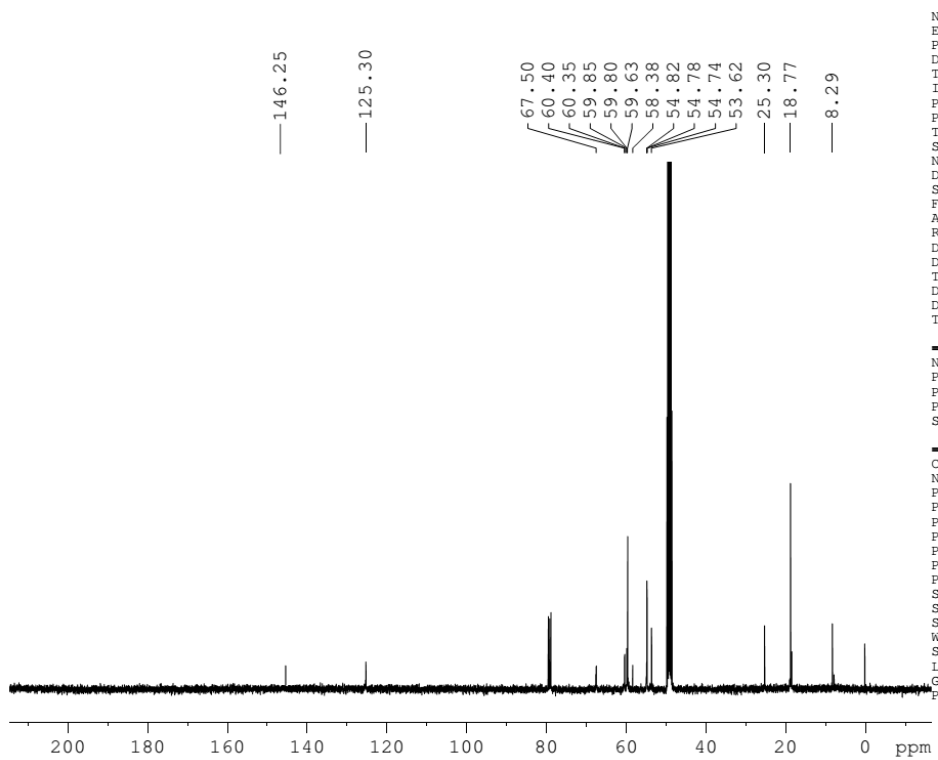

**Fig.6 C-NMR of 2b**

PPC+APTEOS, Si29

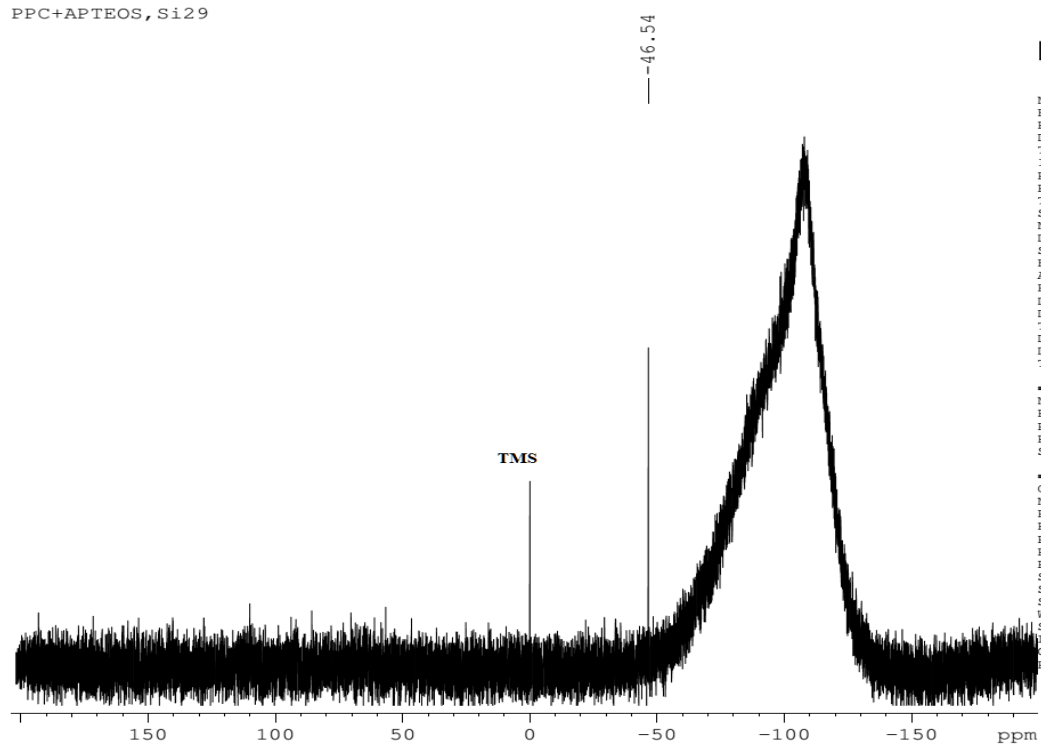

Fig.7 Si-NMR of 2b

PPC+APTEOS, P31

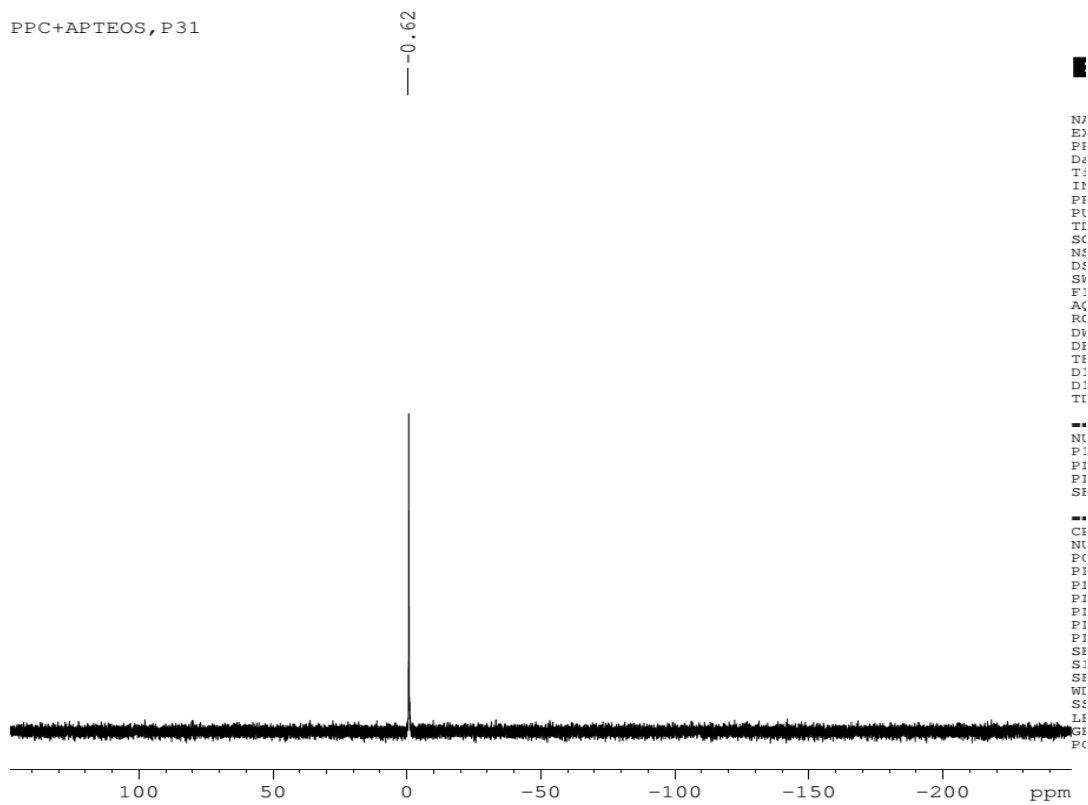

Fig.8 P-NMR OF 2b

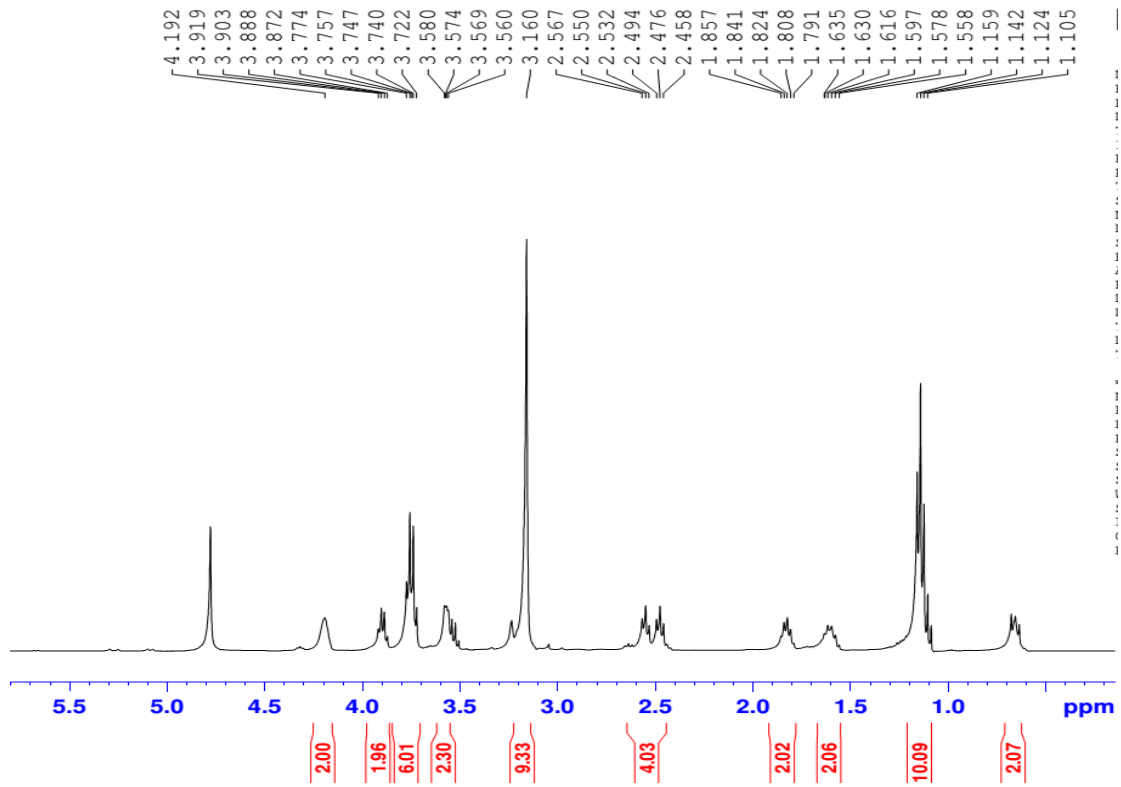

**Fig.9 H-NMR of 2e**

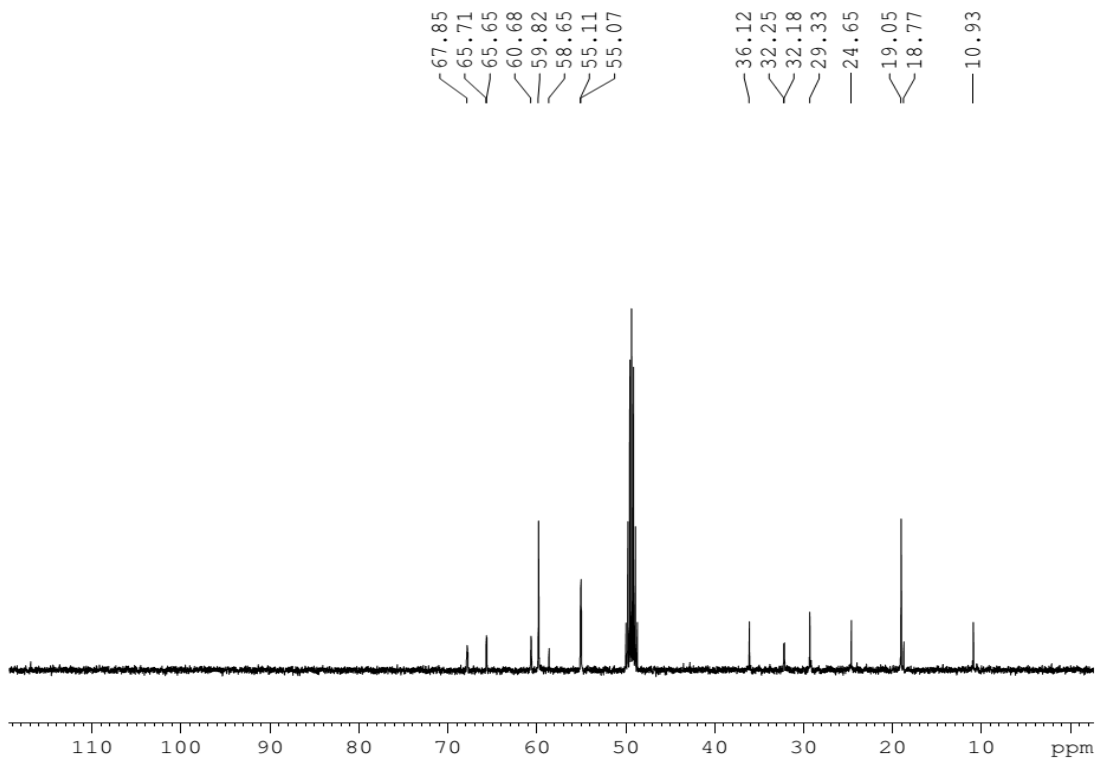

**Fig.10 C-NMR of 2e**

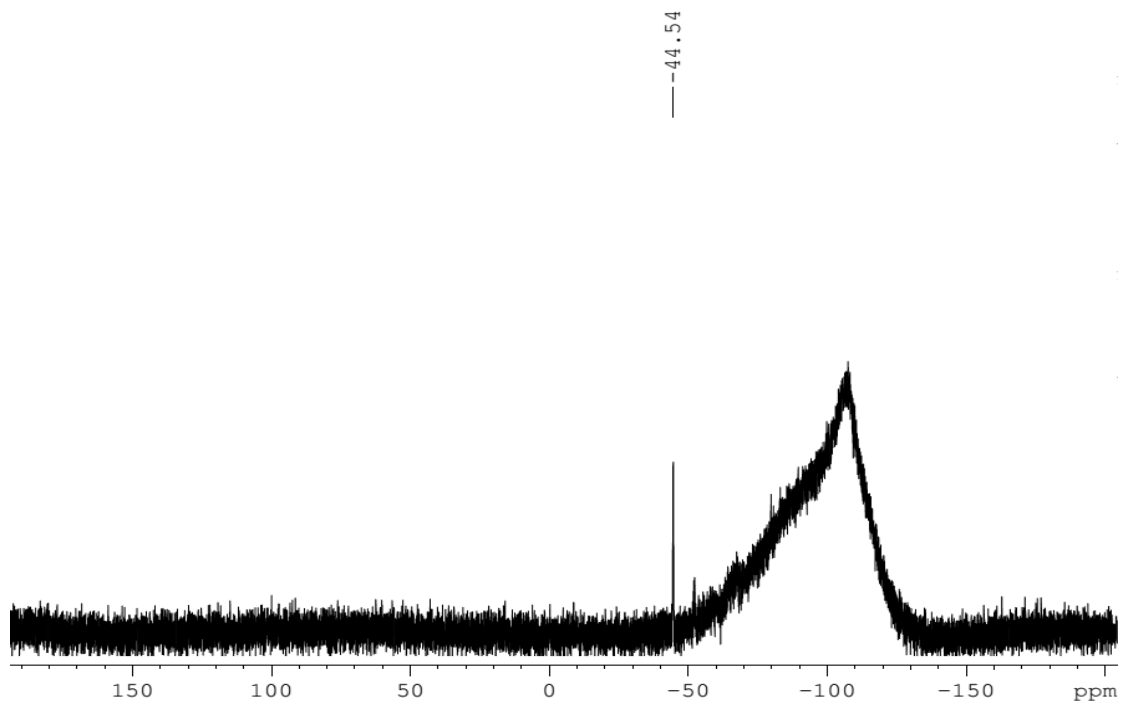

**Fig.11 Si-NMR of 2e**

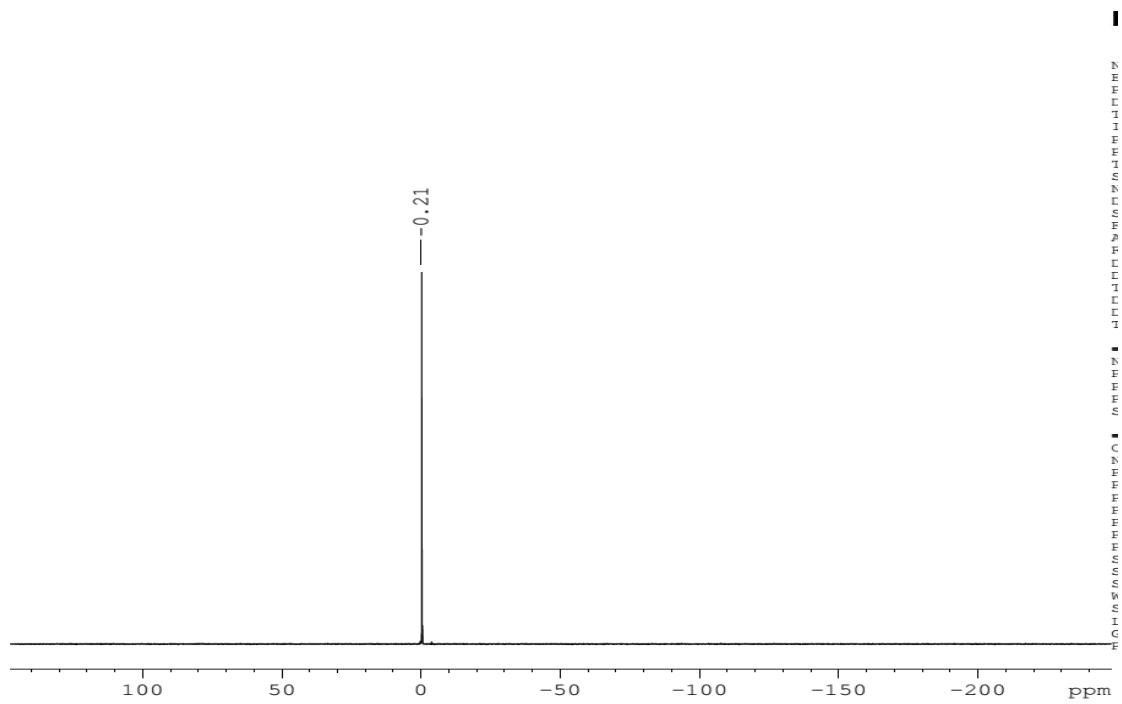

**Fig.12 P-NMR of 2e**
